# Supplementary material for: Critical enzymes for biosynthesis of cucurbitacin derivatives in watermelon and their biological significance
Source: PubMed Central journal article supplement (PMC7429850; doi:10.1038/s42003-020-01170-2), 2020-08-14
Supplement: 42003_2020_1170_MOESM3_ESM.pdf [file 42003_2020_1170_MOESM3_ESM.pdf]

## Description of Additional Supplementary Files

**File Name: Supplementary Data 1**

**Description** Dose dependent neuronal results.

**File Name: Supplementary Data 2**

**Description** HPLC results of wounding and *ACTs* over expression.
